**TITLE:** DIAZEPAM FAILS TO PROTECT BRAIN TISSUE IN HYPOXIC STRESS

**AUTHORS:** L. Berntman, M.D., F.A. Welsh, Ph.D., J.J. BianRosa, M.D., J.R. Harp, M.D.

**AFFILIATION:** The Departments of Anesthesia, University of Pennsylvania and Temple University and the Division of Neurosurgery, University of Pennsylvania, Philadelphia, Pennsylvania 19104

#### Introduction:

Both barbiturates and hypothermia ameliorate changes in brain tissue metabolites during hypoxic-ischemic stress in the rat and this has been interpreted to represent a protective effect. Reduction of brain oxygen consumption ( $\text{CMRO}_2$ ) by both hypothermia and barbiturates may be a major factor in this protection. In hypoxic stress, comparison of equidepressant hypothermic and barbiturate treatment shows hypothermia to be more effective in protecting brain tissue.<sup>1</sup> This may be secondary to cardiovascular depression induced by barbiturates, to increased blood oxygen content in hypothermia, or to other factors. A combination of diazepam and nitrous oxide has been shown to reduce brain oxygen consumption to the same extent as barbiturates with much less cardiovascular depression, therefore we used diazepam/ $\text{N}_2\text{O}$  anesthesia to investigate whether the reduced  $\text{CMRO}_2$  per se has a protective effect in arterial hypoxia.

#### Methods:

Male Wistar rats were mechanically ventilated with 70%  $\text{N}_2\text{O}$  in  $\text{O}_2$  via tracheotomy. Blood pressure and temperature were recorded and arterial blood gases were sampled intermittently. One carotid artery was dissected free. Following stabilization  $\text{FIO}_2$  was reduced, and the carotid clamped. Control animals were maintained on 5%  $\text{O}_2$ , 25%  $\text{N}_2$  in  $\text{N}_2\text{O}$ , and the experimental group, in addition, received diazepam 2.25 mg/kg i.v. The brain was frozen in situ with liquid  $\text{N}_2$  after 20 min. of hypoxia ( $\text{PaO}_2$  21-23 torr) for subsequent analysis of cortical concentrations of ATP, phosphocreatine (PCr) and lactate. Protection was evaluated by the preventive effects of diazepam on the changes in metabolite levels produced.

#### Results:

There was no difference between the two groups in temperature ( $37^\circ\text{C}$ ), blood pressure (124 torr),  $\text{PO}_2$  (21.5 torr) or  $\text{PCO}_2$  (30 torr). In the control group 3/10 animals had ATP (figure 1) values close to normoxic levels ( $2.5 \mu\text{moles} \cdot \text{g}^{-1}$ ) on both sides, the rest (7/10) had a pronounced energy failure on the ligated side and normal values on the unligated. The results in the diazepam group were more scattered, 3/9 had preserved ATP concentrations on both sides, 4/9 had very low values in the ligated hemisphere with normal concentrations on the other side, while 2/9 had bilateral energy failure. The concentrations of PCr paralleled the changes in ATP while lactate showed an inverse relationship. This could be expected from pH-dependent creatinekinase equilibrium.

#### Discussion:

These results indicate that, in the present model, 70% of the control animals had metabolic changes compatible with neuronal damage, while in the diazepam treated group 67% showed the corres-

ponding alterations in the ligated side, but in addition, 22% also had energy failure in the unligated side. These results indicate that the diazepam-induced reduction of  $\text{CMRO}_2$  does not protect from hypoxic insult.

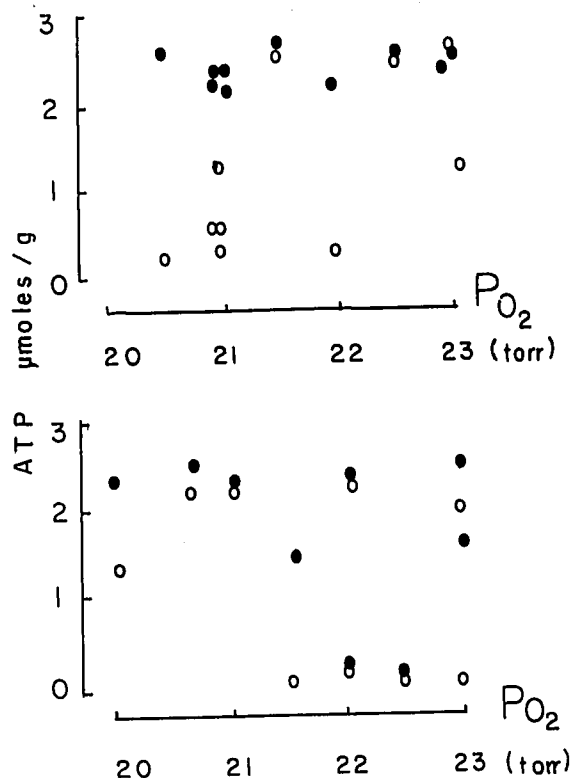

#### Figures:

Individual Cerebral Cortical Concentrations of ATP plotted against arterial  $\text{PO}_2$ . Control group - top figure; Diazepam treated animals - bottom figure. Open circles denote ligated side and closed circles the unligated side.

#### References:

1. Hagerdal, M., Welsh, F.A., Keykhah, M.M., Perez, E., and Harp, J.R.: Protective effects of combinations of hypothermia and barbiturates in cerebral hypoxia in the rat. *Anesthesiology*, 49: 165-169, 1978.
2. Carlsson, C., Hagerdal, M., Kaasik, A., Siesjo, B.K.: The effects of diazepam on cerebral blood flow and oxygen consumption in rats and its synergistic interaction with nitrous oxide. *Anesthesiology*, 45: 319-325, 1976.
